1

---

2 ***Lung functions among children and adolescents with sickle***  
3 ***cell disease receiving care at Jaramogi Oginga Odinga***  
4 ***Teaching and Referral Hospital Kisumu, Kenya***

---

5 Lung functions among children and adolescents with sickle cell disease

6

7

8 Fredrick O. Olewe<sup>1,2\*</sup>

9 Constance N. Tenge<sup>1¶</sup>

10 Irene K. Marete<sup>1¶</sup>

11

12

13 1 Department of Child Health and Pediatrics School of Medicine, Moi University

14 2 Center for Research in Therapeutic Science (CREATES)- Strathmore University

15

16

17 \*[fred84doc@gmail.com](mailto:fred84doc@gmail.com) (FO)

18

19 ¶These authors contributed equally

20

## 21 Abstract

22 Sickle cell disease is a genetic disorder associated with lifelong symptoms of anemia, vaso-occlusive crisis  
23 and organ damage. Pulmonary complications and declining lung functions are contributors to morbidity  
24 and mortality. Determination of lung functions can enable early diagnosis and institution of appropriate  
25 intervention.

26 The objectives were; To determine the prevalence, patterns, and the factors associated with abnormal lung  
27 functions in children and adolescents aged 6-17 years with confirmed diagnosis Sickle Cell Disease.

28 This was a cross sectional study done at Jaramogi Oginga Odinga Teaching and Referral Hospital in  
29 Kisumu, Kenya. A total of 138 participants were recruited. A structured data collection tool was used to  
30 collect Socio-demographics and clinical characteristics. The spirometry was done using NDD Easy-On PC  
31 spirometer and results entered into database, cleaned and analyzed for proportions, frequency, mean, range  
32 and odds ratio at 95% confidence level.

33 Females were 65(47%), males 73(53%), and the mean age was 10.99 years with SD of 3.15. A total of  
34 79(57%) were from rural and fuel used was fired wood 41%. Hospital admission were 84(61%), vaso-  
35 occlusive crisis 104 (75%), acute chest syndrome 61(44%) and blood transfusions 56(40%) in the last 12  
36 months. Prevalence of abnormal lung functions was 28 % (39), restrictive pattern 26(67%) and obstructive  
37 pattern 13(33%). Urban setting (OR 24.101 p value 0.163), being female (OR 18.911 p value 0.069), and  
38 blood transfusion (OR 11.683 p value 0.195) had high odds ratio while, stable hydroxyurea use (OR 0.525  
39 p value 0.678) and hospital admission (OR 0.048 p value 0.121) had low odds ratio, but not statistically  
40 significant.

41 One third had abnormal lung function mostly restrictive followed by obstructive pattern. Residence in urban  
42 setting, being female and blood transfusion had high odds ratio, while stable hydroxyurea use and hospital  
43 admission had low odds ratio but no statistically significant.

44

45

## 46 Introduction

47

48 Sickle cell Disease (SCD) is a genetic disorder of the hemoglobin molecule that forms part of the red blood  
49 cell. The red blood cell is made up of a hem group and four globin chains which comprise of two beta and  
50 two alfa chains (B2a2). The gene clusters on chromosome 16 and 11 control globin chain production. The  
51 allele which is responsible for production of SCD is autosomal recessive and is found on the short arm of  
52 chromosome 11 (1).

53 In Sub Saharan Africa, around 240,000 children are born with the disease each year (2). Most of these  
54 children die without ever being diagnosed as there is limited newborn screening and early treatment in Sub-  
55 Saharan Africa. SCD is responsible for 50-90% of under-five mortalities in low income countries. This is  
56 because there is limited data on the natural history of the disease in our setting which makes early  
57 identification and treatment of the complications difficult leading to poor prognosis (3)

58 It is predicted that the numbers of children with this disorder will steadily increase over the next 40 years  
59 if mechanisms are not put in place to control the disease. Given this predicted rise in numbers of children  
60 with SCD, major investment in clinical research is necessary to fully understand the natural history of sickle  
61 cell disease in our setting and the associated respiratory complications (4).

62 Children with homozygous state (Hb SS which usually have a more severe course of the disease or Hb SC  
63 with a milder course of the disease) are usually symptomatic with lifelong symptoms. which can be acute  
64 or chronic with chronic organ damage which can present as kidney failure, stroke, stunting cardiomyopathy  
65 and chronic lung disease which present with respiratory symptoms (5) (3)

66 Usually, the severity of the disease is attributed to a number of factors such as genetic modifiers, nutritional  
67 status, access healthcare among others (6). However, the real burden and the prevalence of associated  
68 morbidities such as obstructive and restrictive lung disease which can eventually progress to chronic lung  
69 disease remains elusive (4).

70 There have also been contradicting findings from previous studies on whether the pattern of lung function  
71 abnormality contributes to future morbidity and mortality among SCD patients. In contrast, it has been  
72 argued that, the pattern of abnormal lung function test is not associated with previous or future painful crisis  
73 or acute chest syndrome and that, the abnormal lung functions are sometimes over estimated in certain  
74 circumstances (7).

75 It has been difficult comparing results between older studies which is hindered by the fact that there were  
76 many different reference values and criteria used to define lung function abnormalities (8)

77 Acute and chronic lung complications in sickle cell disease are major causes of morbidity and mortality,  
78 accounting for up to 20-30% of all sickle cell deaths. This indicates that screening should be done early and  
79 required interventions instituted in order to reduce the burden of respiratory related complications among  
80 sickle cell patients (9)

81 The most prevalent abnormal spirometry findings among children and adolescents with SCD varies  
82 globally. In the US in a study done by Cohen and colleagues, noted that 30% of children had an abnormal  
83 lung function pattern. The most common abnormal pattern was obstruction which was found in 16%, with  
84 fewer patients having restriction at 7% (7). In Italy, Tassel found out that the most prevalent pattern was  
85 restrictive at 13% with obstruction at 5%, which is similar to what has been noted in some of the African  
86 countries (10)

87 In Sub Saharan Africa, which is a low income setting, restrictive spirometry pattern is the most prevalent  
88 pathological pattern. However, among pediatric patients with SCD living in high- income countries,  
89 obstructive lung function is more frequent than restrictive. This is a study which was done to compare the  
90 abnormal lung functions among children with SCD in Africa and United Kingdom (Arigliani, et al., 2019)

91 In the general populations, it has been established that a number of factors affect lung function, both  
92 environmental and intrinsic factors. In addition, it has been noted that lung function decline over time  
93 among children living with SCD. Regarding risk factors for abnormal lung function in children with SCD,

94 it has been pointed out that there is an association with history of acute chest syndrome (ACS), whereas the  
95 rate of painful crises seemed to be unrelated to respiratory abnormalities, it has also been observed that  
96 patients with more than 3 episodes of ACS had lower FEV1 than the predicted value (12), (13), (14).

97 In addition, Malnutrition was also associated with increased risk of restrictive spirometry pattern in  
98 children with SCD from Central Africa, while high body mass index (BMI) percentile was found to be an  
99 independent predictor of increase in forced expiratory volume at one second (FEV1) in patients from High  
100 Income Countries. Furthermore, Sex as an independent variable has been noted to have no significant  
101 influence on the respiratory function abnormalities in children with sickle cell disease in the same study.  
102 Arigliani and colleagues also noted that lung function decline with age in both children from low income  
103 and high income countries with differences in the patterns of abnormalities (12) (8)(15)(16), (17)

104 In a study done in West Africa, ACS, hydroxyurea use and painful crisis were found to be significantly  
105 associated with changes in lung functions. Furthermore, the use of hydroxyurea as a disease modifying  
106 drug in sickle cell disease reduces the progression of loss of lung function in children with SCD (18) (19).  
107 Additionally, a History of asthma and wheezing has also been associated with obstructive lung function  
108 abnormality as was observed in a study by Manuel and colleagues (20), (21).

## 109 **Methods and materials**

### 110 **Study site**

111 This was a descriptive cross-sectional hospital-based study carried out at Jaramogi Oginga Odinga Teaching  
112 and Referral Hospital (JOOTRH) in Kisumu a level five hospital in western Kenya. Recruitment was done  
113 at the two outpatient clinics. The clinic at the Obama Children's hospital catered for children aged 6 to 13  
114 years while those who are between 14 to 17 years were recruited from the hemato-oncology clinic within  
115 the same hospital which has a well-established sickle cell clinic.

116

117 **Study population**

118 Children with SCD receiving care at JOOTRH

119 **Study period**

120 The study was done over a period of six months from 1<sup>st</sup> October 2023 to 30<sup>th</sup> March 2024

121 **Eligibility criteria**

122 **Inclusion criteria**

123 1. Children between 6-17 years with clinical features of SCD and with a confirmatory test and receiving  
124 care at JOOTRH whose parent or guardian consented and those who above 7 years gave a written  
125 assent

126 **Exclusion criteria**

- 127 1. Confirmed cases of or on treatment for pneumonia, pulmonary tuberculosis or any other respiratory  
128 disease at the time of recruitment
- 129 2. Children who were not able to follow instruction for the study procedures due to illness or any other  
130 reason
- 131 3. Children who were on bronchodilator or steroids for active treatment of asthma

132

133 **Sample size**

134 The sample size was calculated using the Fisher's formula based on a p of 0.3 from the study by Cohen  
135 which showed a prevalence of abnormal lung function at 30% (7).

$$n = \frac{Z^2 \hat{p}(1 - \hat{p})}{e^2}$$
$$\frac{1.96^2 * 0.3 * 0.7}{0.05^2} = 323$$

139

140 Given that the total number of unique children above 6-17 years seen per month was approximately 30,  
141 therefore, the approximate total population of interest during data collection period was estimated to be 240  
142 children.

143 Corrected sample size for finite population

$$144 \frac{323}{1+(n-1)/N}$$

145

$$147 \frac{323}{1+(323-1)/240}$$
$$148 =137.9=138$$

149

## 150 Recruitment

151 The Principal Investigator (PI) and the research assistants were trained on spirometry by a Respiratory  
152 Society of Kenya (RESOK) trainer and certified to perform and interpreted the spirometry results. After  
153 being attended to by the clinician on duty for routine clinic visit, potential participants were directed to the  
154 PI or the research assistant for screening who identified children who met the study requirements. Parents  
155 or guardians who were willing to let their children join the study proceeded to give written consent and  
156 written assent was obtained from children above 7 years. The PI or the research assistant took a short  
157 medical history of the participants including demographics such as age and sex, residence rural or urban,  
158 cooking space whether indoor or outdoor, fuel used for cooking whether firewood, gas or charcoal. Medical  
159 information was also obtained which included hydroxyurea use, number of vaso-occlusive crisis (VOC),  
160 ACS, blood transfusion, and hospital admission in the past 12 months. Anthropometric measurements such  
161 as weight and height was obtained and used to calculate BMI and recorded on a structured data collection  
162 tool which was validated before the study. Where information was not clear, this was clarified from the  
163 patients' folders.

164 Two NDD Easy-on PC spirometer device were available for the study where one acted as a backup. The  
165 spirometry test was presented as a blowing game with computer incentives of blowing off the candles on a  
166 birthday cake first for purposes of practice and during the actual procedure where blowing off all the candles

167 corresponded with achieving the required forced expiration. The participants were encouraged to blow and  
168 where necessary demonstration was done alongside the participant.

169 The patients were put in a sitting position with their arms resting on the arm rest of the chair and their back  
170 straight and given time to relax and be composed before the spirometry procedure. A clean mouth piece  
171 was attached to the spirometer device, patient's nose clipped and he or she was instructed to take in normal  
172 three breathes before taking in a deep breath and then blowing out forcefully for 6 seconds, as the instructor  
173 verbally encouraged the patient and the patient looking at the candle on the screen. The procedure was  
174 repeated 3 times to obtain the highest values with minimal curve variability, which was in conformity with  
175 standard international guidelines of European Respiratory Society and American Thoracic Society in terms  
176 of quality and reproducibility (23). Quality control was done to ensure consistency and the best values were  
177 used for interpretation of the results in comparison to the predicted reference values. Where there was  
178 difficulty interpreting the results, a pulmonologist was consulted for assistance

### 179 **Independent variables**

180 Some of the independent variables in the study were age, sex, BMI which was categorized as; normal,  
181 underweight, overweight or obesity, vaso-occlusive crisis, acute chest syndrome, blood transfusions,  
182 number of hospital admissions, stable hydroxyurea use, history of asthma or wheeze, type of cooking fuel  
183 used, residence either rural or urban and cooking area either outdoor or indoor.

### 184 **Dependent variable**

185 The dependent variable was abnormal lung function of which three types of outcomes were considered  
186 which were; restrictive i.e. lower FEV1 < 80% of lower limit of normal and obstructive i.e. lower FVC < 80%  
187 or FEV1/FVC ratio < 70% of the lower limit of normal or mixed with binary out comes for each and was  
188 coded as 0 absent or 1 present for each case.



## 189 Data Management and Analysis

### 190 Data entry and cleaning

191 Data was entered into database and cleaned to confirm accuracy and conformity with the source document  
192 before analysis.

### 193 Data analysis

194 Data analysis was done according to the statistical analysis plan (SAP) in place to compute the frequency  
195 and proportion for categorical data, mean, SD and range for continuous data. A bivariate analysis was done  
196 for association, odds ratio at 95% confidence level. Fishers exact tests where applicable to test for  
197 statistically significance.

### 198 Ethical Approval

199 The study procedures were started after obtaining ethical approval from the Institutional Research Ethics  
200 Committee (IREC) of Moi University/ Moi Teaching and Referral Hospital and from Jaramogi Oginga  
201 Odinga Teaching and Referral Hospital Institutional Scientific Ethics and Research Committee (ISERC).  
202 Administrative approval was obtained from the Hospital allowing the conduct of the study within the  
203 facility.

204 Written consent was obtained from parents/guardian of all the children below 18 years and assent from  
205 children above 7 years.

### 206 Confidentiality

207 The participant's information was de-identified to remove any personally identifiable information in order  
208 to maintain confidentiality. The folders were kept in lockable drawers which were accessible to the PI and  
209 other authorized study staff only

210

## 211 Results

212 A total of 151 participants were screened, 13 of them were screen excluded while 138 met the inclusion  
213 criteria and considered for the final analysis

### 214 Socio demographic characteristics

#### 215 Characteristics of the participants' care giver

216 Out of 138 participants, 103(75%) of the participants were brought to the hospital by their mothers, 13  
217 (9%) were brought by their fathers while only 8(6%)were brought by others who were neither their mother,  
218 father or guardian. Out of the total number of parents, guardians and others who brought the participants to  
219 the hospital, 59(43%) of the parents or guardians of the children surveyed had attained secondary education,  
220 42(30%) had Tertiary level while 3(2%) had no education.

#### 221 Socio-demographic characteristic of the participants

222 Table 1 shows the demographic characteristics; Sex distribution shows males were of 73(53%) while the  
223 female were 65(47%).

224

225

226

227

228

229

230

231

232

233

234

235

236

237 *Table 1: sociodemographic characteristics*

238

239

240

241

242

243

244

245

246

247

248

249

250

251

252

253

254

## 255 [Anthropometric measurements](#)

256

257 Anthropometric measurements showed that the mean age was 10.99 years with an SD of 3.15. The mean

258 weight of the children was 29.06 kg (with the minimum weight of 14.1 kg and maximum weight of 62 kg)

259 and SD of 9.8. The children had a mean height of 138.19 cm, (minimum height was 108 cm and maximum

260 height as 178 cm) and SD of 15.5.

261

262 **Clinical characteristics**

263 Looking at the clinical features in table 2, 102(74%) of the children reported being on stable dose of  
264 hydroxyurea within the las 3 months, 34(25%) reported no VOC while 71(51%) had 1-2 VOC,  
265 additionally,77(56) had no ACS while 52 (38%) had one to two ACS in the past 12 months. In addition,  
266 82(59) had received no blood transfusion and only 10(4%) had received more than three blood transfusions  
267 in the past 12 months, while 84(61%) had been admitted to the hospital within the last 12 months

268

*Table 2 patients clinical factors*

| <b>Clinical characteristics</b>                 | <b>Freq (n)</b> | <b>Percentage</b> |
|-------------------------------------------------|-----------------|-------------------|
| <b>Stable hydroxyurea dose</b>                  |                 |                   |
| <b>Yes</b>                                      | 102             | 74                |
| <b>No</b>                                       | 36              | 26                |
| <b>No of VOCs within 12 months</b>              |                 |                   |
| <b>None</b>                                     | 34              | 25                |
| <b>one-Two</b>                                  | 71              | 51                |
| <b>&gt;three</b>                                | 33              | 24                |
| <b>No of ACS within 12 months</b>               |                 |                   |
| <b>None</b>                                     | 77              | 56                |
| <b>one-Two</b>                                  | 52              | 38                |
| <b>&gt;three</b>                                | 9               | 6                 |
| <b>No of Blood transfusion within 12 months</b> |                 |                   |
| <b>None</b>                                     | 82              | 59                |
| <b>One-two</b>                                  | 46              | 33                |
| <b>&gt;three</b>                                | 10              | 4                 |
| <b>Admission history within 12 months</b>       |                 |                   |
| <b>Yes</b>                                      | 84              | 61                |
| <b>No</b>                                       | 54              | 39                |

269

## 270 Prevalence of abnormal lung function

271 Out of the total number of the children, 39(28%) of them had abnormal lung functions, while 99(72%) had  
272 normal lung function test

## 273 Patterns of abnormal lung functions

274 Table 3 shows patterns of abnormal lung function. Out of the 39 children with abnormal lung functions  
275 26(67%) had restrictive lungs function pattern while the rest 13(33%) had obstructive lung function pattern  
276 with none of the children having obstructive pattern.

277 *Table 3: patterns of abnormal lung functions*

| <b>Pattern of abnormal lung function</b> | <b>n</b> | <b>Percentage (%)</b> |
|------------------------------------------|----------|-----------------------|
| <b>Restrictive</b>                       | 26       | 67                    |
| <b>Obstructive</b>                       | 13       | 33                    |
| <b>Mixed</b>                             | 0        | 0                     |

278

## 279 Factors associated with abnormal lung functions

280 Table 4 shows factors associated with abnormal lung functions. The findings showed that being  
281 female appears to have a substantially high odds ratio of 18.91 compared to males, though the p-  
282 value 0.069, 95% CI (0.794, 450.23). There is no significant association between weight status  
283 (underweight or normal) with abnormal lung functions, normal weight low odds ratio of 0.3036  
284 and a p-value of 0.301 95% CI (0.032, 2.902). Living in an urban setup had remarkably high odds  
285 ratio 24.10 compared to rural settings, with a p-value 0.163 95% CI (0.276, 2104.596).

286 *Table 4: Factors associated with abnormal lung functions*

|                                                         |             | <b>Odds Ratio</b> | <b>P Value</b> | <b>[95% Conf. Interval]</b><br><b>Lower, upper</b> |
|---------------------------------------------------------|-------------|-------------------|----------------|----------------------------------------------------|
| <b>Sex</b>                                              | Male        | REF               |                |                                                    |
|                                                         | Female      | 18.911            | 0.069          | 0.794 , 450.25                                     |
| <b>Weight</b>                                           | Underweight | REF               |                |                                                    |
|                                                         | Normal      | 0.304             | 0.301          | 0.032, 2.902                                       |
|                                                         | overweight  | 0                 |                |                                                    |
| <b>Type of residence</b>                                | Rural       | REF               |                |                                                    |
|                                                         | Urban       | 24.102            | 0.163          | 0.276, 2104.596                                    |
| <b>Type of fuel used at home</b>                        | firewood    | REF               |                |                                                    |
|                                                         | charcoal    | 0.196             | 0.389          |                                                    |
|                                                         | Gas         | 0.134             | 0.486          |                                                    |
| <b>No. of ACS in past 12 months</b>                     | 0           | REF               |                |                                                    |
|                                                         | 1-2         | 2.444             | 0.533          | 0.147, 40.578                                      |
|                                                         | ≥3          | 1 (empty)         |                |                                                    |
| <b>No of Blood Transfusions received in the last 12</b> | 0           | REF               |                |                                                    |
|                                                         | 1-2         | 11.683            | 0.195          | 0.285, 479.720                                     |
|                                                         | ≥3          | 1 (empty)         |                |                                                    |
| <b>Stable hydroxyurea dose for the last 3 months</b>    | No          | REF               |                |                                                    |
|                                                         | Yes         | 0.525             | 0.678          | 0.025, 10.927                                      |
| <b>admission in the past in the last 12 months</b>      | No          | REF               |                |                                                    |
|                                                         | Yes         | 0.048             | 0.121          | 0.001, 2.225                                       |

288 **Clinical factors and patterns of abnormal lung functions**

289 Table 5 shows clinical factors and patterns of abnormal lung functions where more than 3 blood transfusion  
 290 in 12 mothers showed statistically significant association with both restrictive and obstructive abnormal  
 291 patterns of lung function.

292 *Table 5: Clinical factors and patterns of abnormal lung functions*

293

| 294 <b>Factors</b>                                              |     | <b>Restrictive<br/>(Low FVC)</b> | <b>Obstructive<br/>(Low FEV1)</b> | <b>P-value</b> |
|-----------------------------------------------------------------|-----|----------------------------------|-----------------------------------|----------------|
| 296 <b>No of Vaso-Occlusive Crisis</b>                          | 0   | n(%)                             | n(%)                              | 0.614          |
|                                                                 | 1-2 | 7(70)                            | 3(30)                             |                |
|                                                                 | 3   | 13(85)                           | 2(15)                             |                |
| <b>Number of Acute chest syndrome (ACS)</b>                     | 0   | 11(75)                           | 3(25)                             | 0.816          |
|                                                                 | 1-2 | 16(78)                           | 4(22)                             |                |
|                                                                 | 3   | 12(73)                           | 5(27)                             |                |
| <b>Number of blood transfusions received</b>                    | 0   | 2(100)                           | 0(0)                              | <b>0.031</b>   |
|                                                                 | 1-2 | 14(80)                           | 3(20)                             |                |
|                                                                 | 3   | 16(82)                           | 4(20)                             |                |
| <b>Patient on stable hydroxyurea dose for the last 3 months</b> | Yes | 0(0)                             | 2(100)                            | 0.566          |
|                                                                 | No  | 22(79)                           | 6(21)                             |                |
| <b>History of asthma</b>                                        | Yes | 8(73)                            | 3(27)                             | 0.573          |
|                                                                 | No  | 1(100)                           | 0(0)                              |                |
| <b>History of Wheezing</b>                                      | Yes | 29(76)                           | 9(24)                             | 0.314          |
|                                                                 | No  | 3(100)                           | 0(0)                              |                |
| <b>Admitted in the past 12 month</b>                            | Yes | 27(75)                           | 9(25)                             | 0.434          |
|                                                                 | No  | 19(79)                           | 5(21)                             |                |

## 297 Discussion

298

### 299 Prevalence of abnormal lung functions

300 Children living in low and middle income countries still have a substantial burden of abnormal lung  
301 functions. This was demonstrated in this study where 39(28%) of the children had an abnormal lung  
302 functions mostly of restrictive followed by obstructive pattern. Factors such as being female, blood  
303 transfusion and living in urban setting had high odds ratios while hospital admissions and stable  
304 hydroxyurea use had very low odds ratios.

305 There is poor access to health services and noncompliance to the sickle cell treatment leading to  
306 complications such as VOC, ACS and hypoxic injuries. These frequent insults from hypoxia VOC and ACS  
307 contribute to the interstitial lung damage leading to abnormal lung functions (8). There was also a female  
308 predominance where out of 66, 20(30.3%) had abnormal lung function. This female predominance can be  
309 explained by the cultural practices of cooking with firewood in an enclosed cooking space as women are  
310 expected to cook hence exposure smoke which leads to lung injuries hence abnormal lung functions. The  
311 findings are similar with the study done in the USA by Cohen et al that found a prevalence of 30% among  
312 children and adolescents (7). However, in a study done by Dei-Adomakoh and colleagues in adults with  
313 sickle cell, there was 70.4% prevalence which indicated that the decline in lung function among children is  
314 a continuous process and worsens as they grow older (14). The difference can be explained by the fact that  
315 the study populations were different in characteristic majorly adults as oppose to children and adolescents  
316 in our case.

317 In Nigeria, in a study that was done by Arigliani to compare lung functions among Nigerian children and  
318 those from the United Kingdom, there was a prevalence of 38% in Nigeria, and 27 % in United Kingdom.  
319 This is slightly higher in Nigeria than our study which was at 28%, but finding in the UK were similar to  
320 this study despite the fact that this was a cohort study where the participants were followed up and UK has  
321 a better health care system than Africa which alludes to the fact that developing abnormal lung function



322 could be intrinsic to having sickle cell disease. In this Study also, confounders were excluded as appropriate  
323 (11). These findings cannot over emphasize the need for including lung function test as part of routine care  
324 for children and adolescents with sickle cell disease

325 In Kuwait, A Adekite found a similar prevalence of 28.5%. Besides, they used a different phenotype of  
326 HbSC with very high fetal hemoglobin levels with mild symptoms and still had comparable prevalence to  
327 this study which involved HbSS phenotype. This equally showed that there is more work to be done to  
328 establish the exact mechanism of lung damage in sickle cell disease (24)

### 329 [Patterns of abnormal lung function in children with SCD](#)

330 There has been a contentious argument as to what is the most prevalent pattern of abnormal lung function  
331 among children with sickle cell disease and as to whether this varies with regions. In this study, we found  
332 out that restrictive pattern was the most prevalent and double at 26(67%) while obstructive pattern was  
333 13(33%). There was no mixed pattern observed in this study. The restrictive pattern seen in this study can  
334 be explained by the fact that most of the participants were underweight which is associated with restrictive  
335 lung functions. This is in contrast to a study by Cohen, where they found out that the most prevalent pattern  
336 was obstructive at 16% (7). This was possibly due to the urban setting of their studies as previously it has  
337 been shown that children in such set up are more predisposed to hyperactive airway disease. In Ghana, Kuti  
338 and Adegoke found that most of the children had restrictive lung disease followed by obstructive and a few  
339 had mixed pattern (25). This is in congruent to this study where we found out a similar trend except for  
340 mixed pattern which was not found among these children, which could be because we used only spirometry  
341 which was not adequate in characterizing the patterns further.

342 There seem to be regional variation of the patterns as in the study done by Manuel et al which found exact  
343 reverse of our findings in this current study. In their study, the most prevalent pattern was obstructive at  
344 19% followed by restrictive at 9% (20), they equally did not report on the mixed pattern. Their study setting  
345 was more urban which is similar to the study by Cohen and colleagues but with different results. In this

346 study, reversibility testing was not done to further characterize the obstructive pattern into either reversible  
347 or irreversible which would give a glimpse of the possible cause as this was outside the study aims.

348 The previously differing opinions of the pattern of abnormal lung functions among children with sickle cell  
349 disease is slowly taking shape as more studies indicate that in Africa and some European countries, the  
350 most prevalent pattern is restrictive lung disease. This pattern can be explained by the repeated insults to  
351 the lungs as a target organ as had been alluded to earlier. Furthermore, it was noted by Kuti and Adegoke  
352 in Nigeria in their study that 22.1% of the children with SCD had restrictive pattern while 5.8% had  
353 obstructive and only 1.9% had mixed pattern (25). Though the findings are slightly different, it gives a  
354 similar picture to the findings in this study where 19% had restrictive, 9% obstructive with none having  
355 mixed pattern.

### 356 [Factors associated with abnormal lung functions in children with SCD](#)

357 It is now known that lung functions decline over time among children living with Sickle Cell Disease,  
358 however, there is paucity of data on some of the contributing factors to this rapid decline. However, the  
359 factors that contribute to this decline still remains elusive to the medical fraternity. Different studies have  
360 found different factors to be contributory, furthermore, most factors are usually not statistically significant  
361 despite the high odds ratio. This was no different from this study.

362 In this study being female had an increased risk of having an abnormal lung function compared to male OR  
363 18.91 CI 0.7943,450.25, however, this was not statistically significant with a p value of 0.069. This is  
364 similar to the study done in Central Africa by Arigliani which associated being female with increased risk  
365 of having abnormal lung functions (12). The increased likelihood in females compared to males in this  
366 study can be explained by the fact that in greater Africa and mostly in rural areas cooking is done indoors  
367 with firewood which produces a lot of smoke by females increasing their exposure to pollutants leading to  
368 lung damage hence developing the abnormal lung functions. This was in contrast to the previous studies  
369 which showed that sex has no influence on the risk of having an abnormal lung function among children

370 with sickle cell disease (9), (26) . This difference could not be explained since there were more males in  
371 this study compared to females at 73(52.55%) and 65(47.45%) respectively. However, it can be  
372 hypothesized that the difference could be attributed to the cooking environment where mostly occupied by  
373 females.

374 When it comes to the BMI, most studies have found an association between obesity and abnormal lung  
375 functions mostly obstructive lung disease as in the case of a study by Koumbourlis where BMI had a  
376 statistically significant influence with a p value of 0.02 (27). In this study having a normal BMI was shown  
377 to be protective, however, this was not statistically significant with a p value of 0.301, with OR of 0.304 at  
378 95% CI (0.0318, 2.9019). This similarity is due to the fact that we used similar populations of study. In  
379 another study however, BMI was found to have no association with abnormal lung function (14). This  
380 difference could be explained by the fact that they used slightly different study population.

381 In this study, it was postulated that urban residence may have some significant contributions in children  
382 with sickle cell anemia, this could be similar to populations without SCD. This was attributed to the  
383 industrial and motor vehicle emissions causing air pollution in town centers which contributes to lung  
384 injury. It was found out that living in urban set up had an increased risk of having an abnormal lung  
385 functions at more than 24 times compared to rural set up. However, this was not statistically significant OR  
386 24.1015 CI 95% (0.2760, 2104) with a p value of 0.163.

387 In Nigeria, use of solid fuels was found to have no significant association with abnormal lung functions in  
388 children with sickle cell disease (28). This was similar to this study where it was found out that type of fuel  
389 had no significant association with abnormal lung functions p value 0.389 for charcoal and 0.486 for gas.  
390 However, compared to use of fired wood, charcoal and gas were protective with OR of 0.1959 and 0.1344  
391 respectively. This can be attributed to the amount of smoke produced by firewood within an enclosed indoor  
392 cooking place which predisposes the house occupants to air pollutions hence increasing chances of having  
393 lung damage and abnormal lung functions.

394 Given the hypothesized mechanism of lung injury leading to fibrosis and interstitial lung injury with  
395 ultimate impaired lung function in children with SCD, the number of Acute Chest Syndrome (ACS) has  
396 been associated with the decline in lung function in this kind of population (29). In this study, children who  
397 had more than 2 episodes of ACS in the past 12 months had a slightly increased likelihood of having an  
398 abnormal lung functions twice as high compared to those who had none, however, this was not statistically  
399 significant OR 2 .44 CI (0.1473, 40.5778) at 95% confidence level. In a study by Arigliani, having more  
400 than 3 episodes of ACS was associated with impaired lung function (12). However, Cohen and colleagues  
401 found no association of ACS with abnormal lung functions. This difference can be explained by the fact  
402 that Cohen study was done in a high income country with good health care services to children with SCD  
403 which limited the effect of ACS due to timely and adequate management of the acute complications of  
404 patients with sickle cell disease. Kuti also found out that ACS was associated with abnormal lung functions  
405 in Nigerian children with SCD with an OR of 8.5 (25), (7).

406 Sometimes children with SCD, can have complications which warrant urgent transfusions. This can be  
407 occasional or at times they can be dependent on chronic transfusion. As an independent factor, transfusion  
408 was associated with abnormal lung functions with a p value of 0.195. However, in the presence of other  
409 factors, children who received more than 2 transfusions within the last 12 months had greatly increased risk  
410 of having an abnormal lung function even though it was not statistically significant OR 11.683 95% CI  
411 (0.285, 479) P value 0.195 this increased likelihood may not be due to transfusion itself but could be  
412 attributed to other issues such as noncompliance to medications and clinic appointments predisposing them  
413 to multiple complications which contribute to their abnormal lung functions.. This was different from the  
414 study by Adekile in Nigeria which found out that that there was no association between FEV1 and  
415 transfusions (24). This difference was because they narrowed only to the effect on FEV as opposed to  
416 generally looking at the abnormal lung function as was the case in this study.

417 The mainstay of therapeutic management of SCD patient is by use of hydroxyurea which is based on the  
418 weight and patients' response. Lung functions have been shown to improve after starting hydroxyurea

419 treatment (18). This raised the questions as to whether hydroxyurea use can slow or prevent the  
420 development of abnormal lung function. In this study, being on a stable dose of hydroxyurea for three  
421 months shown to be protective, however, it was not statistically significant with an OR 0.566 at 95% CI  
422 (0.02, 10.92) with a p value of 0.678. This was similar to a study by J. Stewart who found no significant  
423 association with a p value 0.24 (30). Similarly Arigliani found no significant association in Central Africa  
424 (12). This shows that there is still work to be done in order to ascertain the contribution of hydroxyurea to  
425 the decline in lung functions among children with SCD. In a meta-analysis by Taksande, hydroxyurea use  
426 was found to be protective, but not statistically significant which is similar to this study (21).

427 Following the devastating complications of SCD, most children needs frequent and repeated hospital  
428 admission for appropriate and proper care. This is not possible for some families from low income countries  
429 thus leads to inadequate medical care. In this study, hospital admission within the past year was protective  
430 but not significant OR 0.047 P value 0.121 CI (0.001, 2.224). this can be explained by the fact that children  
431 with more hospital admissions received adequate and appropriate medical care which reduced their chances  
432 of developing the complications associated with development of abnormal lung functions. This was  
433 different from a study by Kuti which found a significant association of abnormal lung functions with  
434 hospitalization p value <0.05 in Nigeria (25), but similar to the findings of the study by Arigliani and  
435 colleagues (8). It is therefore necessary for improved health care services for children and adolescents with  
436 SCD in order to improve their general well-being and reduce risk of developing an abnormal lung functions.  
437 This study had a limitation of wider confidence interval which can be improved in future by doing cohort  
438 studies in Africa with larger sample sizes.

439

440

441

## 442 Conclusion

443 The prevalence of abnormal lung function among children with Sickle Cell Disease was 28%

444 The most prevalent pattern of abnormal lung function was restrictive followed by obstructive and no mixed  
445 pattern

446 Urban setting, being female and the number of blood transfusion received within the past 12 months were  
447 associated with high odds ratio while hospital admissions and stable hydroxyurea used were associated with  
448 low odds ratio.

## 449 Acknowledgment

450 I would like to thank Prof. Bernhards Ogutu, Dr. Vincent Were, Dr. John Orimbo, Dr. Allan Otieno,  
451 Caroline Atieno, Pamela Atieno Nashon Okello, Sophy Omondi, Grace Omukoko, Ishmael Sports and Jane  
452 Olum for their valuable contribution towards the realization of the study goals.

## 453 References

- 454 1. Tenge CN. Preventing birth of sicklers as an effective strategy in a sickle cell disease control  
455 programme. *East Afr Med J.* 2019;96(1):2241–9.
- 456 2. Williams TN. Sickle Cell Disease in Sub-Saharan Africa. *Hematol Oncol Clin North Am.* 2016  
457 Apr 1;30(2):343–58.
- 458 3. Uyoga S, Macharia AW, Mochamah G, Ndila CM, Nyutu G, Makale J, et al. The epidemiology of  
459 sickle cell disease in children recruited in infancy in Kilifi, Kenya: a prospective cohort study.  
460 *Lancet Glob Heal.* 2019 Oct 1;7(10):e1458–66.
- 461 4. Kato GJ, Piel FB, Reid CD, Gaston MH, Ohene-Frempong K, Krishnamurti L, et al. Sickle cell  
462 disease. *Nat Publ Gr [Internet].* 2018;4. Available from: [www.nature.com/nrdp](http://www.nature.com/nrdp)
- 463 5. Watenga EK, Songok JJ, Tenge CN. The prevalence of sickle cell trait among adolescents in  
464 Bungoma County, Kenya. *East Afr Med J.* 2019;96(5):2683–91.
- 465 6. Rees DC, Brousse VAM, Brewin JN. Determinants of severity in sickle cell disease. *Blood Rev*  
466 *[Internet].* 2022;56(June):100983. Available from: <https://doi.org/10.1016/j.blre.2022.100983>
- 467 7. Cohen RT, Strunk RC, Rodeghier M, Rosen CL, Kirkham FJ, Kirkby J, et al. Pattern of lung  
468 function is not associated with prior or future morbidity in children with sickle cell anemia. *Ann*  
469 *Am Thorac Soc.* 2016;13(8):1314–23.
- 470 8. Arigliani M, Gupta A. Management of chronic respiratory complications in children and  
471 adolescents with sickle cell disease. *Eur Respir Rev [Internet].* 2020;29(157):1–9. Available from:  
472 <http://dx.doi.org/10.1183/16000617.0054-2020>
- 473 9. Dei-Adomakoh YA, Afriyie-Mensah JS, Forson A, Adadey M, Ndanu TA, Acquaye JK. Lung  
474 Function Abnormalities in Sickle Cell Anaemia. *Adv Hematol.* 2019;2019.
- 475 10. Tassel C, Arnaud C, Kulpa M, Fleurence E, Kandem A, Madhi F, et al. Leukocytosis is a risk  
476 factor for lung function deterioration in children with sickle cell disease. *Respir Med.* 2011  
477 May;105(5):788–95.
- 478 11. Arigliani M, Castriotta L, Zubair R, Dogara LG, Zuiani C, Raywood E, et al. Differences in lung  
479 function between children with sickle cell anaemia from West Africa and Europe. *Thorax.* 2019  
480 Dec 1;74(12):1154–60.
- 481 12. Arigliani M, Kitenge R, Castriotta L, Ndjule P, Barbato V, Cogo P, et al. Lung function in  
482 children with sickle cell disease from Central Africa. *Thorax.* 2019 Jun 1;74(6):604–6.
- 483 13. Ndukwu CI, Ozoh OB, Ale BM, Ayuk AC, Elo-Ilo JC, Awokola BI. Spirometry Abnormalities  
484 and Its Associated Factors Among Primary School Children in a Nigerian City. *Clin Med Insights*  
485 *Pediatr.* 2021;15:117955652110018.
- 486 14. Dei-Adomakoh YA, Afriyie-Mensah JS, Forson A, Adadey M, Ndanu TA, Acquaye JK. Lung  
487 Function Abnormalities in Sickle Cell Anaemia. *Adv Hematol.* 2019;2019.
- 488 15. Cook J, Jefferis O, Matchere P, Mbale E, Rylance J. Sickle-cell disease in Malawian children is  
489 associated with restrictive spirometry: a cross-sectional survey. *Int J Tuberc Lung Dis [Internet].*  
490 2013 Sep 1 [cited 2022 Apr 24];17(9):1235–8. Available from:  
491 <http://www.ncbi.nlm.nih.gov/pubmed/23827770>
- 492 16. Ruchet Patel, M.D.\* Olufolake Adisa MD. AMF. Decline of Lung Function in Children with

- 493 Sickle Cell Disease Is Not Associated with Restrictive Defects. 2017 [cited 2022 Aug 28];  
494 Available from: [www.atsjournals.org](http://www.atsjournals.org).
- 495 17. Willen SM, Cohen R, Rodeghier M, Kirkham F, Redline SS, Rosen C, et al. Age is a predictor of a  
496 small decrease in lung function in children with sickle cell anemia. *Am J Hematol*. 2018 Mar  
497 1;93(3):408–15.
- 498 18. Kotwal N, Pillai DK, Darbari DS, Sun K, Koumbourlis AC. Spirometric Changes After Initiation  
499 of Hydroxyurea in Children With Sickle Cell Anemia. *J Pediatr Hematol Oncol* [Internet]. 2021  
500 Dec 30 [cited 2022 Apr 24]; Available from: <http://www.ncbi.nlm.nih.gov/pubmed/34966092>
- 501 19. Meier ER, Miller JL. Sickle cell disease in children. *Drugs*. 2012;72(7):895–906.
- 502 20. Manuel Arteta<sup>1</sup>, Andrew Campbell<sup>1</sup>, Mehdi Nouriae<sup>2</sup>, Sohail Rana<sup>2</sup>, Onyinye Onyekwere<sup>2</sup>,  
503 Gregory Ensing<sup>1</sup>, et, al. Abnormal pulmonary function and associated risk factors in children and  
504 adolescents with sickle cell anemia. *Physiol Behav*. 2017;176(1):139–48.
- 505 21. Taksande A, Jameel PZ, Pujari D, Taksande B, Meshram R. Variation in pulmonary function tests  
506 among children with sickle cell anemia: A systematic review and meta-analysis. *Pan Afr Med J*.  
507 2021;39(140).
- 508 22. Moore VC. Spirometry: Step by step. *Breathe*. 2012;8(3):233–40.
- 509 23. Beydon N, Davis SD, Lombardi E, Allen JL, Arets HGM, Aurora P, et al. An Official American  
510 Thoracic Society/European Respiratory Society Statement: Pulmonary function testing in  
511 preschool children. *Am J Respir Crit Care Med*. 2007;175(12):1304–45.
- 512 24. Adekile AD, Azab AF, Owayed A, Khadadah M. Correlates of Pulmonary Function in Children  
513 with Sickle Cell Disease and Elevated Fetal Hemoglobin. *Med Princ Pract*. 2018;27(1):49–54.
- 514 25. Kuti B, Adegoke S. Authors’ Response – Pulmonary function abnormalities in Nigerian children  
515 with sickle cell anemia: Prevalence, pattern, and predictive factors. *Pediatr Respirol Crit Care*  
516 *Med*. 2019;3(1):18.
- 517 26. Achigbu KI, Odetunde OI, Chinawa JM, Achigbu EO, Ikefuna AN, Emodi IJ, et al. Pulmonary  
518 function indices in children with sickle cell anemia in Enugu, south-east Nigeria. *Saudi Med J*.  
519 2015 Aug 3;36(8):928–34.
- 520 27. Koumbourlis AC. Lung function in sickle cell disease: An elusive relationship. Vol. 51, *Pediatric*  
521 *Pulmonology*. John Wiley and Sons Inc.; 2016. p. 665–7.
- 522 28. Arigliani M, Dogara LG, Zubair R, Castriotta L, Pusiol A, Zuiani C, et al. Lung function  
523 impairment in pediatric patients with sickle cell anemia from Nigeria is associated with low steady  
524 state hemoglobin. *Am J Hematol*. 2019 Mar 1;94(3):E70–1.
- 525 29. Al Biltagi M, Bediwy AS, Toema O, Al-Asy HM, Saeed NK. Pulmonary functions in children and  
526 adolescents with sickle cell disease. *Pediatr Pulmonol*. 2020 Aug 1;55(8):2055–63.
- 527 30. Stewart JAT, Willen SM, Cohen R, Rodeghier M, Kirkham F, Redline SS, et al. BMI percentile is  
528 an independent predictor of increase in lung function in children with sickle cell anemia. *Am J*  
529 *Hematol*. 2019 May 1;94(5):E136–8.
- 530
